# Supplementary material for: Expression of Leucine-rich Repeat-containing Protein 32 Following Lymphocyte Stimulation in Patients with Non-IgE-mediated Gastrointestinal Food Allergies
Source: PubMed Central journal article supplement — Yale J Biol Med. 2020 Dec 29;93(5):645–55. (PMC7757073), 2020-12-29
Supplement: yjbm_93_5_645_appendix.pdf [file yjbm_93_5_645_appendix.pdf]

## Appendix A

**Supplementary Table 1. Comparison of the expression levels of *LRRC32* mRNA between patients during the onset and before OFC.**

|                        | Fold induction of <i>LRRC32</i> mRNA <sup>†</sup> |                         |                                |                        | <i>p</i> value* |
|------------------------|---------------------------------------------------|-------------------------|--------------------------------|------------------------|-----------------|
|                        | Patients with onset                               |                         | Patients with OFC <sup>b</sup> |                        |                 |
|                        | n                                                 |                         | n                              |                        |                 |
| $\alpha$ -Casein       | 12                                                | 1.379<br>(0.655–2.826)  | 4                              | 1.633<br>(0.598–3.238) | >0.1            |
| $\kappa$ -Casein       | 12                                                | 0.962<br>(0.5205–3.028) | 3                              | 1.677<br>(0.328–3.867) | >0.1            |
| $\alpha$ -Lactalbumin  | 12                                                | 2.012<br>(1.311–3.371)  | 4                              | 1.207<br>(0.855–1.977) | >0.1            |
| $\beta$ -Lactoglobulin | 12                                                | 1.968<br>(1.593–2.171)  | 4                              | 2.240<br>(1.488–2.900) | >0.1            |
| Pmix                   | 12                                                | 2.495<br>(1.270–5.098)  | 4                              | 1.901<br>(0.721–3.290) | >0.1            |
| CM <sup>a</sup>        | 10                                                | 2.033<br>(1.159–3.378)  | 4                              | 1.555<br>(0.945–2.395) | >0.1            |

<sup>a</sup> CM, Cow milk. <sup>b</sup> OFC, Oral food challenge

Data are expressed as the median (interquartile ranges). \*Mann–Whitney U test.

<sup>†</sup> Fold induction of *LRRC32* mRNAs was calculated by dividing the expression in the stimulated samples with that of the non-stimulated samples, following normalization to that of 18S rRNA.

**Supplementary Table 2. mRNA levels in patients with FPIES and patients without FPIES.**

|                |                        | Fold induction of mRNA†          |                         |                 |
|----------------|------------------------|----------------------------------|-------------------------|-----------------|
|                |                        | Patients with FPIES <sup>b</sup> | Patients without FPIES  | <i>p</i> value* |
| <i>LRRC32</i>  | $\alpha$ -casein       | 1.865<br>(1.207–2.937)           | 0.777<br>(0.556–2.742)  | >0.1            |
|                | $\kappa$ -casein       | 2.020<br>(0.895–3.867)           | 0.590<br>(0.4153–2.617) | >0.05           |
|                | $\alpha$ -lactalbumin  | 1.763<br>(0.984–2.817)           | 1.638<br>(1.311–3.205)  | >0.1            |
|                | $\beta$ -lactoglobulin | 1.987<br>(1.551–2.900)           | 1.851<br>(1.593–2.171)  | >0.1            |
|                | Pmix                   | 2.394<br>(1.536–3.438)           | 2.047<br>(0.856–5.575)  | >0.1            |
|                | CM <sup>a</sup>        | 2.093<br>(1.373–2.455)           | 1.404<br>(0.993–3.289)  | >0.1            |
| <i>TNFRSF4</i> | $\alpha$ -casein       | 0.959<br>(0.677–1.218)           | 0.929<br>(0.714–1.279)  | >0.1            |
|                | $\kappa$ -casein       | 0.862<br>(0.517–0.997)           | 0.748<br>(0.502–1.024)  | >0.1            |
|                | $\alpha$ -lactalbumin  | 1.678<br>(1.108–2.521)           | 1.532<br>(1.422–2.381)  | >0.1            |
|                | $\beta$ -lactoglobulin | 1.851<br>(1.426–4.130)           | 1.761<br>(1.596–2.177)  | >0.1            |
|                | Pmix                   | 1.735<br>(1.072–2.658)           | 1.652<br>(1.435–2.219)  | >0.1            |
|                | CM <sup>a</sup>        | 1.808<br>(0.896–2.229)           | 1.065<br>(0.886–1.840)  | >0.1            |
| <i>CD69</i>    | $\alpha$ -casein       | 1.060<br>(0.784–1.290)           | 1.164<br>(0.850–1.255)  | >0.1            |
|                | $\kappa$ -casein       | 0.925<br>(0.771–1.137)           | 1.074<br>(0.703–1.125)  | >0.1            |
|                | $\alpha$ -lactalbumin  | 1.328<br>(0.936–1.463)           | 1.370<br>(1.164–2.223)  | >0.1            |
|                | $\beta$ -lactoglobulin | 1.353<br>(0.652–1.466)           | 1.322<br>(1.062–1.647)  | >0.1            |
|                | Pmix                   | 1.289<br>(0.873–1.394)           | 1.444<br>(1.278–2.399)  | >0.1            |
|                | CM <sup>a</sup>        | 1.140<br>(0.920–1.332)           | 1.341<br>(0.775–1.505)  | >0.1            |

**Supplementary Table 3. mRNA levels in the patients with FPIES and patients with FPIAP.**

|                |                        | Fold induction of mRNA <sup>†</sup> |                                  |                 |
|----------------|------------------------|-------------------------------------|----------------------------------|-----------------|
|                |                        | Patients with FPIES <sup>b</sup>    | Patients with FPIAP <sup>c</sup> | <i>p</i> value* |
| <i>LRRC32</i>  | $\alpha$ -casein       | 1.865<br>(1.207–2.937)              | 0.697<br>(0.641–1.558)           | >0.1            |
|                | $\kappa$ -casein       | 2.020<br>(0.895–3.867)              | 0.729<br>(0.434–1.028)           | >0.05           |
|                | $\alpha$ -lactalbumin  | 1.763<br>(0.984–2.817)              | 2.303<br>(1.266–3.505)           | >0.1            |
|                | $\beta$ -lactoglobulin | 1.987<br>(1.551–2.900)              | 1.556<br>(1.187–2.226)           | >0.1            |
|                | Pmix                   | 2.394<br>(1.536–3.438)              | 2.325<br>(1.197–5.812)           | >0.1            |
|                | CM <sup>a</sup>        | 2.093<br>(1.373–2.455)              | 1.649<br>(1.100–2.198)           | >0.1            |
| <i>TNFRSF4</i> | $\alpha$ -casein       | 0.959<br>(0.677–1.218)              | 0.862<br>(0.683–1.015)           | >0.1            |
|                | $\kappa$ -casein       | 0.862<br>(0.517–0.997)              | 0.759<br>(0.410–0.888)           | >0.1            |
|                | $\alpha$ -lactalbumin  | 1.678<br>(1.108–2.521)              | 1.587<br>(1.351–2.357)           | >0.1            |
|                | $\beta$ -lactoglobulin | 1.851<br>(1.426–4.130)              | 1.874<br>(1.541–2.274)           | >0.1            |
|                | Pmix                   | 1.735<br>(1.072–2.658)              | 1.762<br>(1.478–2.095)           | >0.1            |
|                | CM <sup>a</sup>        | 1.808<br>(0.896–2.229)              | 1.190<br>(0.970–1.410)           | >0.1            |
| <i>CD69</i>    | $\alpha$ -casein       | 1.060<br>(0.784–1.290)              | 1.053<br>(0.850–1.255)           | >0.1            |
|                | $\kappa$ -casein       | 0.925<br>(0.771–1.137)              | 0.925<br>(0.750–1.099)           | >0.1            |
|                | $\alpha$ -lactalbumin  | 1.328<br>(0.936–1.463)              | 1.969<br>(1.370–3.153)           | >0.1            |
|                | $\beta$ -lactoglobulin | 1.353<br>(0.652–1.466)              | 2.027<br>(1.201–2.853)           | >0.1            |
|                | Pmix                   | 1.289<br>(0.873–1.394)              | 2.116<br>(1.330–2.902)           | >0.1            |
|                | CM <sup>a</sup>        | 1.140<br>(0.920–1.332)              | 1.246<br>(0.805–1.686)           | >0.1            |

<sup>a</sup> CM, Cow milk. <sup>b</sup> FPIES, Food protein-induced enterocolitis syndrome. <sup>c</sup> FPIAP, food protein-induced allergic proctocolitis. Data are expressed as the median (interquartile ranges). \*Mann–Whitney U test. <sup>†</sup> Fold induction of *LRRC32*, *TNFRSF4*, and *CD69* mRNAs was calculated by dividing the expression in the stimulated samples with that of the non-stimulated samples, following normalization to that of 18S rRNA.

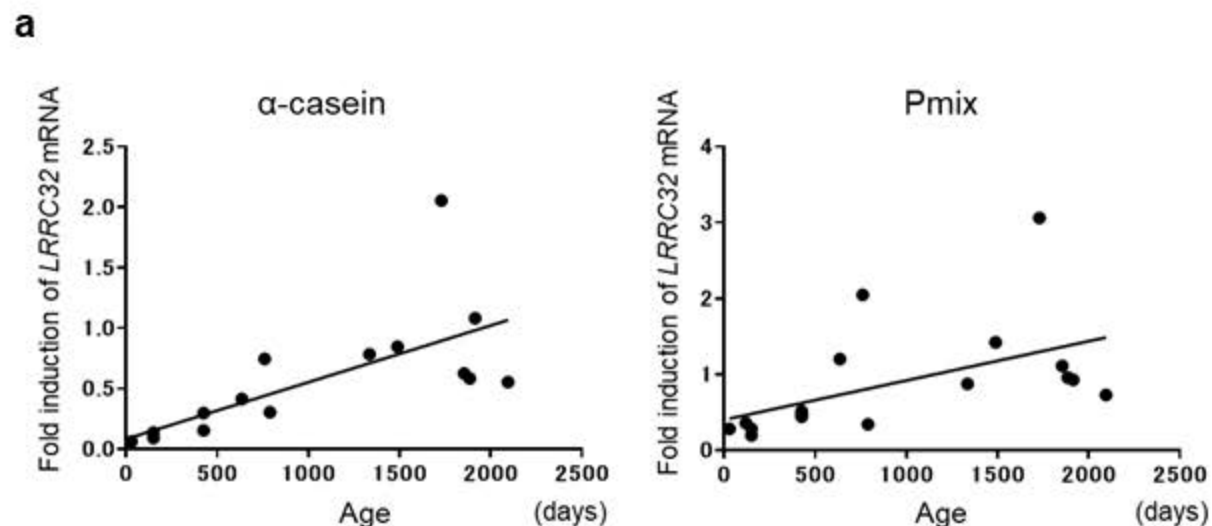

**b**

|                 | n  | r       | p value |
|-----------------|----|---------|---------|
| α-casein        | 16 | 0.8133  | <0.001  |
| κ-casein        | 17 | 0.8039  | <0.001  |
| α-lactalbumin   | 17 | -0.2053 | >0.1    |
| β-lactoglobulin | 17 | -0.1684 | >0.1    |
| Pmix            | 17 | 0.6550  | <0.005  |
| Cow milk        | 16 | 0.5221  | <0.05   |

**Supplementary Fig. 1 Spearman correlation analysis of LRRC32 mRNA levels and age in controls after α-casein and Pmix stimulation .**

**A**, Spearman correlation analysis of LRRC32 levels and age after α-casein and Pmix stimulation.

**B**, Summary of Spearman correlations.
